CORRECTION

# Correction: Intermittent hypoxia regulates stem-like characteristics and differentiation of neuroblastoma cells

Vasanth Kumar Bhaskara, Indra Mohanam, Jasti S. Rao, Sanjeeva Mohanam

The panels presented in [Fig 5E](#) and [Fig 6C](#) were prepared using spliced blot data. Specifically, lanes were removed between lanes 2 and 3 in all four panels in [Fig 5E](#), and lanes were removed between lanes 1 and 2 in all four panels in [Fig 6C](#). The [Figs 5](#) and [6](#) have been updated to clearly mark the splice lines.

The available underlying blot data for [Figs 5E](#) and [6C](#) are provided in [S1](#) and [S2 File](#). The quantitative data underlying the graphs presented in Figs 1-5 are provided in [S3 File](#). The available quantitative data underlying [Fig 6B](#) are provided in [S4 File](#).

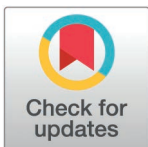

## OPEN ACCESS

**Citation:** Bhaskara VK, Mohanam I, Rao JS, Mohanam S (2025) Correction: Intermittent hypoxia regulates stem-like characteristics and differentiation of neuroblastoma cells. PLoS One 20(7): e0328935. <https://doi.org/10.1371/journal.pone.0328935>

**Published:** July 24, 2025

**Copyright:** © 2025 Bhaskara et al. This is an open access article distributed under the terms of the [Creative Commons Attribution License](#), which permits unrestricted use, distribution, and reproduction in any medium, provided the original author and source are credited.

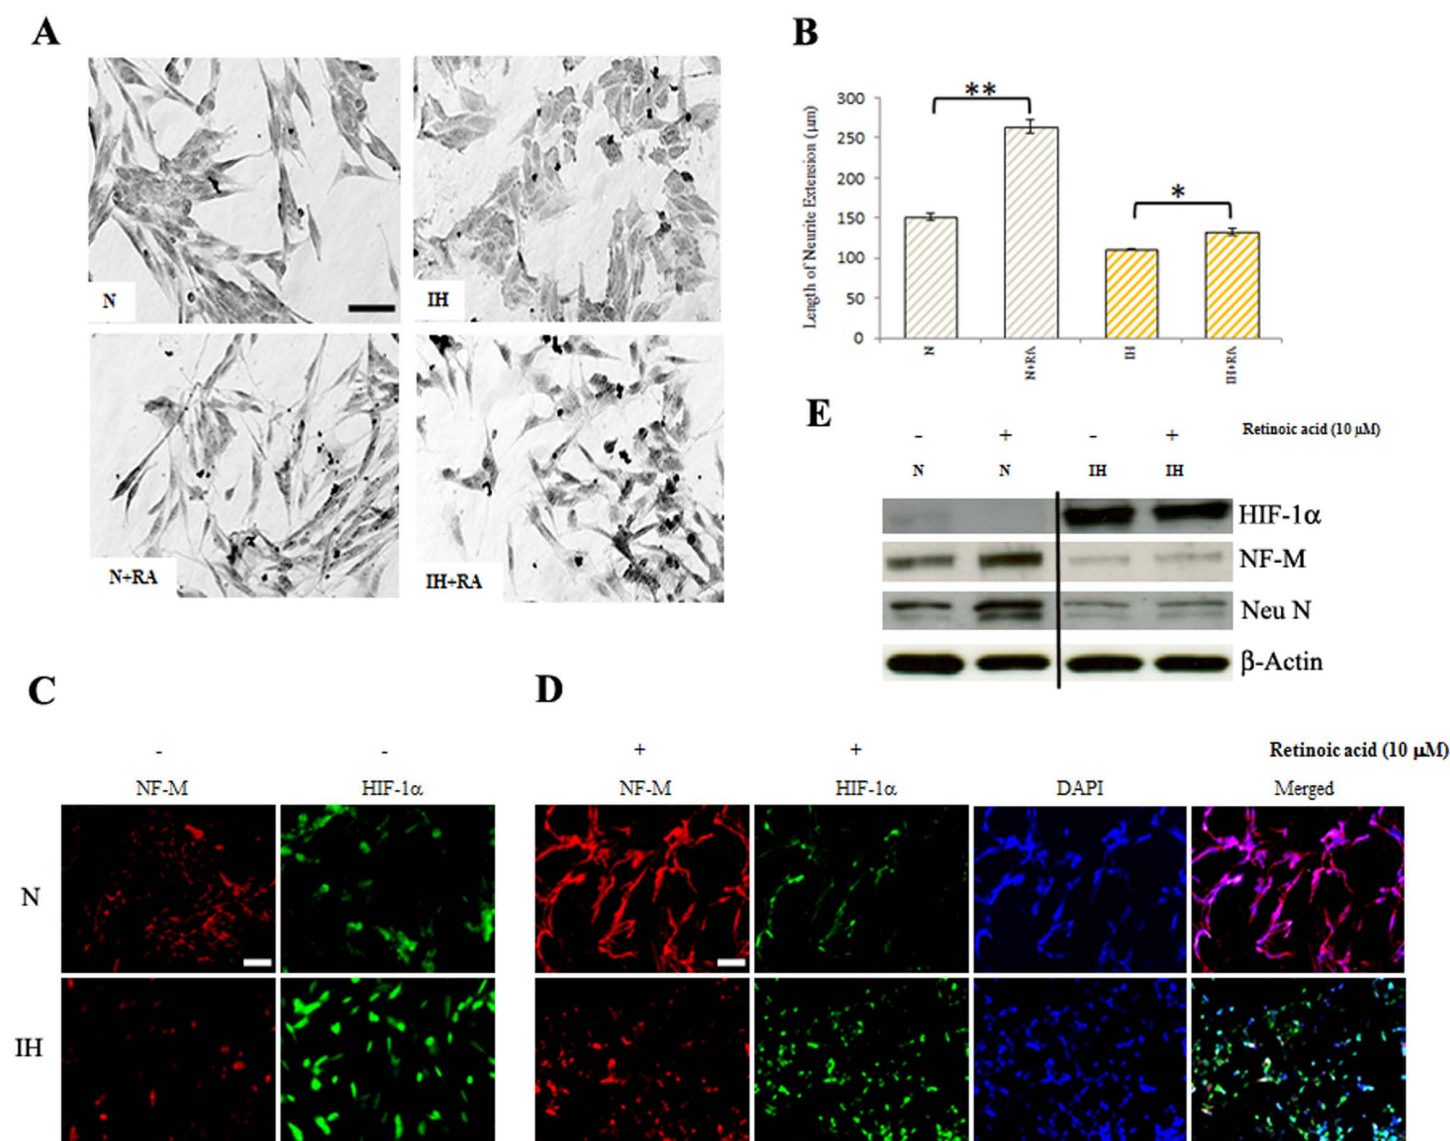

**Fig 5. Effect of retinoic acid on human neuroblastoma cells.** (A) Normoxic (N) and intermittent hypoxia (IH) conditioned neuroblastoma cells were treated with 5 μM retinoic acid for 24 h and cell morphology was examined. Phase-contrast images were taken under bright field using an Olympus CKX41 inverted microscope (bar, 50 μm). (B) Graphic illustration of quantification of neurite lengths of normoxic and intermittent-hypoxia conditioned neuroblastoma cells treated with 5 μM retinoic acid. \* $P < 0.05$  \*\* $P < 0.01$ , retinoic acid-treated versus untreated. (C) Immunofluorescence. Cells were fixed and incubated with primary antibodies for NF-M or HIF-1α. Then cells were washed in PBS and incubated with secondary antibodies, Alexa Fluor 488-conjugated anti-mouse IgG (HIF-1α) or Alexa Fluor 594-conjugated anti-rabbit IgG (NF-M) (bar, 100 μm). (D) Dual Immunofluorescence. Cells were treated with 10 μM retinoic acid for 24 h fixed and incubated with primary antibodies for NF-M or HIF-1α. Then cells were washed in PBS and incubated with secondary antibodies, Alexa Fluor 488-conjugated anti-mouse IgG or Alexa Fluor 594-conjugated anti-rabbit IgG. Nuclei were stained with DAPI. Photomicrographs were taken using Olympus fluorescence microscope (bar, 100 μm). (E) Western blotting: Cells were treated with 10 μM retinoic acid for 24 h. Cell lysates were analyzed for the levels of HIF-1α, NF-M and Neu N proteins by western blotting. β-actin served as loading control.

<https://doi.org/10.1371/journal.pone.0328935.g001>

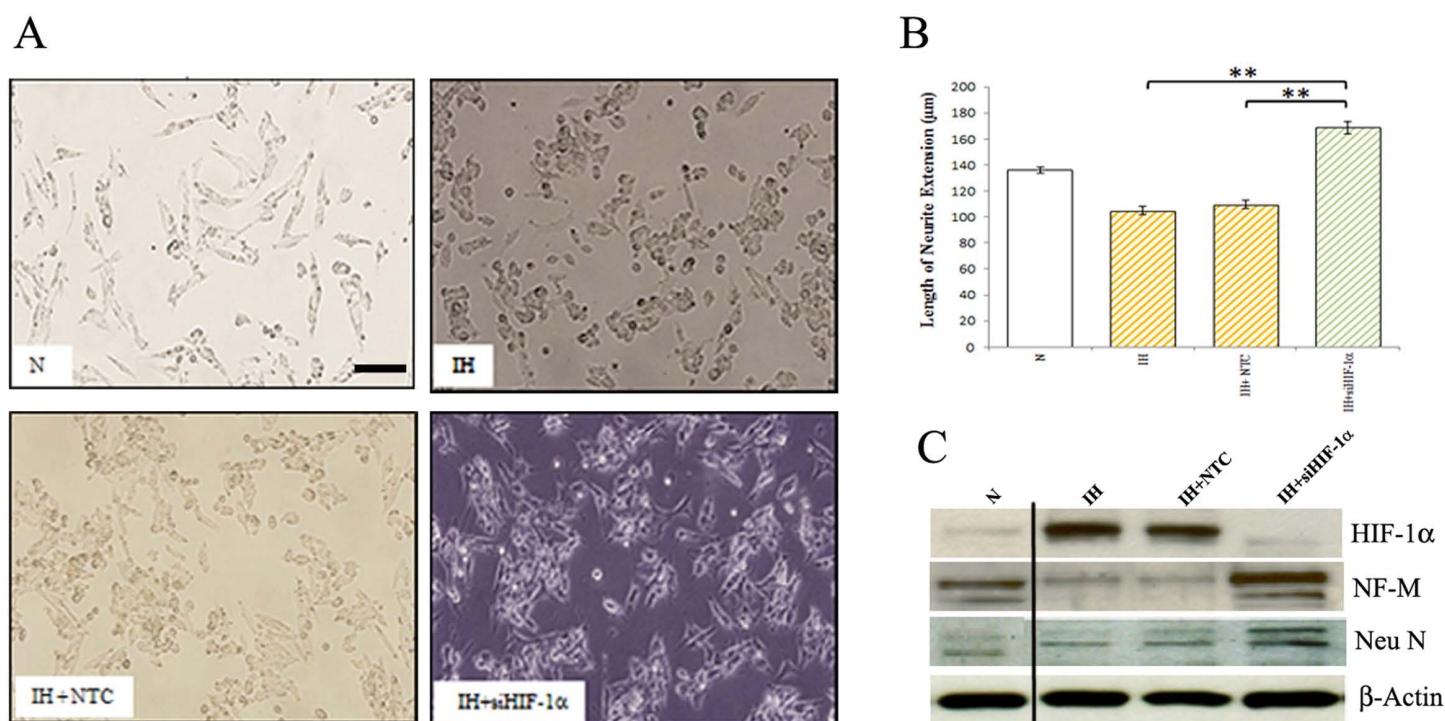

**Fig 6. Effect of HIF-1  $\alpha$  siRNA on differentiation of human neuroblastoma cells.** (A) Normoxic (N) and intermittent hypoxia (IH) conditioned neuroblastoma cells were treated with non-targeted control (NTC) or HIF-1 $\alpha$  siRNA smart pool for 36 h and phase-contrast images were taken under bright field using an Olympus CKX41 inverted microscope (bar, 50  $\mu$ m). (B) Graph illustrates quantification of neurite lengths of cells treated with NTC or HIF-1 $\alpha$  siRNA.  $**p < 0.01$ , intermittent hypoxia conditioned cells treated with HIF-1 $\alpha$  siRNA versus NTC or untreated. (C) Western blotting. Cells were treated with NTC or HIF-1 $\alpha$  siRNA smart pool. After 36 h, cells were lysed and cell extracts were subjected to western blotting analysis for HIF-1 $\alpha$ , NF-M and Neu N.

<https://doi.org/10.1371/journal.pone.0328935.g002>

## Supporting information

**S1 File.** Cropped blot data underlying Fig 5E.  
(TIF)

**S2 File.** Cropped blot data underlying Fig 6C.  
(TIF)

**S3 File.** Quantitative data underlying graphs published in Figs 1–5.  
(XLSX)

**S4 File.** Available quantitative data underlying Fig 6B.  
(XLSX)

## Reference

1. Bhaskara VK, Mohanam I, Rao JS, Mohanam S. Intermittent hypoxia regulates stem-like characteristics and differentiation of neuroblastoma cells. *PLoS One*. 2012;7(2):e30905. <https://doi.org/10.1371/journal.pone.0030905> PMID: 22363512
